# Supplementary material for: Effects of pulpotomy using mineral trioxide aggregate on prostaglandin transporter and receptors in rat molars
Source: PubMed Central journal article supplement (PMC5537257; doi:10.1038/s41598-017-07167-y), 2017-07-31
Supplement: 41598_2017_7167_MOESM1_ESM.pdf [file 41598_2017_7167_MOESM1_ESM.pdf]

## **Supplementary Figure and Table**

### **Effects of pulpotomy using mineral trioxide aggregate on prostaglandin transporter and receptors in rat molars.**

Naoto Ohkura<sup>1\*</sup>, Naoki Edanami<sup>1</sup>, Ryouzuke Takeuchi<sup>1</sup>, Aiko Tohma<sup>1</sup>, Mariko Ohkura<sup>2</sup>, Nagako Yoshiba<sup>1</sup>, Kunihiko Yoshiba<sup>1</sup>, Hiroko Ida-Yonemochi<sup>3</sup>, Hayato Ohshima<sup>3</sup>, Takashi Okiji<sup>4</sup>, Yuichiro Noiri<sup>1</sup>

#### **Affiliations**

<sup>1</sup>Division of Cariology, Operative Dentistry and Endodontics, Department of Oral Health Science, Niigata University Graduate School of Medical and Dental Sciences, Niigata, Japan

<sup>2</sup>Division of Orthodontics, Department of Oral Biological Science, Niigata University Graduate School of Medical and Dental Sciences, Niigata, Japan

<sup>3</sup>Division of Anatomy and Cell Biology of the Hard Tissue, Department of Tissue Regeneration and Reconstruction, Niigata University Graduate School of Medical and Dental Sciences, Niigata, Japan

<sup>4</sup>Department of Pulp Biology and Endodontics, Graduate School of Medical and Dental Sciences, Tokyo Medical and Dental University (TMDU), Tokyo, Japan

\*Correspondence: [ohkura@dent.niigata-u.ac.jp](mailto:ohkura@dent.niigata-u.ac.jp)

## Supplementary Figure 1.

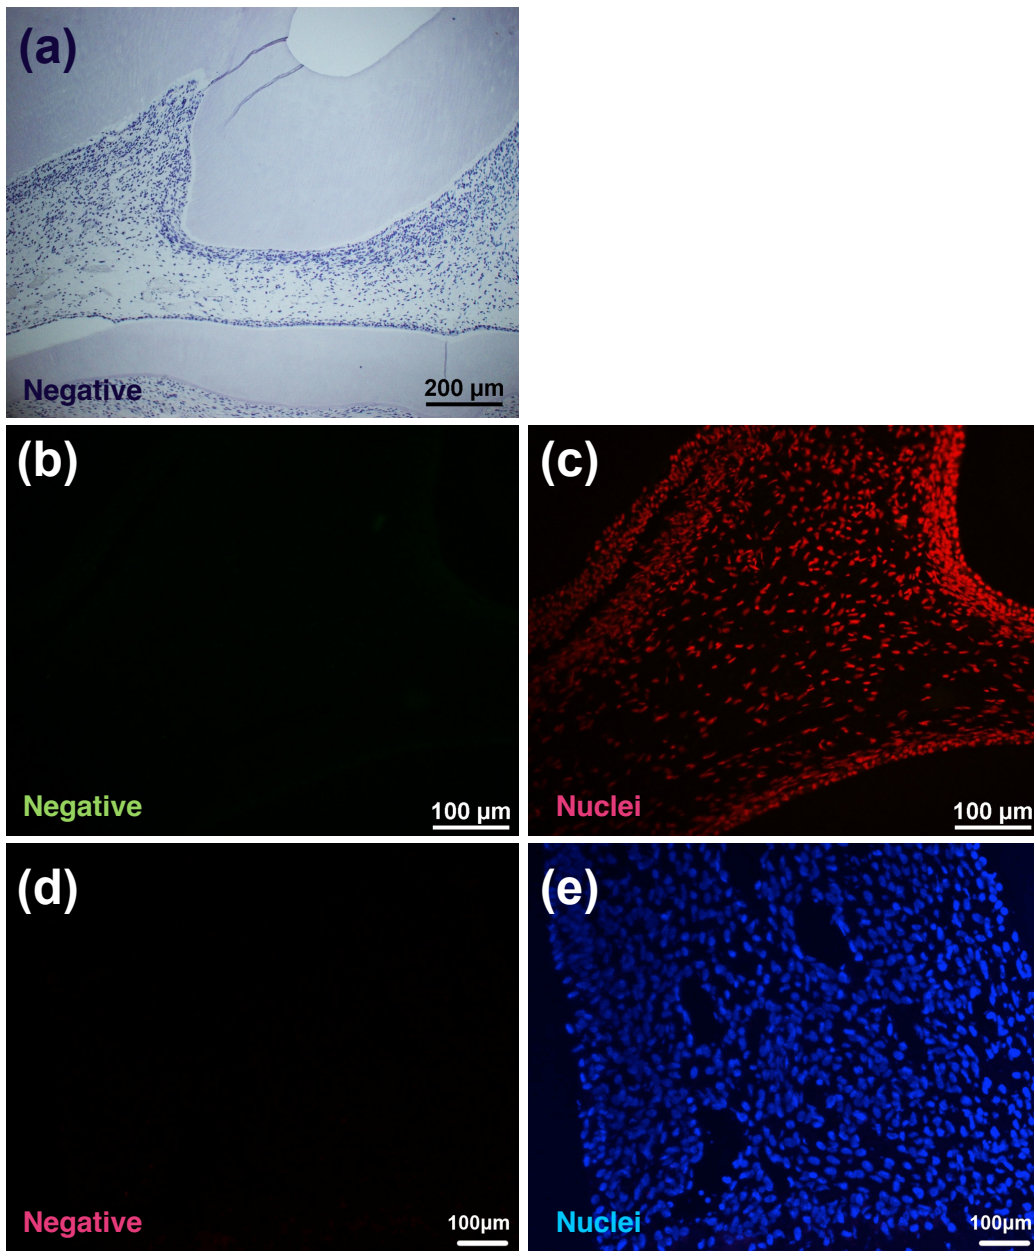

### Negative control staining for antibody validation

Negative control staining was performed by replacing both primary rabbit antibodies with PBS. (a) Negative control for 3,3' diaminobenzidine staining shows no specific immunoreaction. (b, d) The control sections do not exhibit any specific immunoreactivity. (b) Goat anti-rabbit IgG antibody-conjugated AlexaFluor 488 (green) for secondary antibody. (d) Goat anti-mouse IgG antibody-conjugated AlexaFluor 546 (red) for secondary antibody. (c) Propidium iodide (PI: red) is detected in nuclei. (e) 4'6-diamidino-2-phenylindole (DAPI: blue) is detected in nuclei.

**Supplementary Table 1. Primers used in this study**

| Molecular name | Accessin NO.   | Primer            |                        |               |
|----------------|----------------|-------------------|------------------------|---------------|
|                |                | Name of oligomer  | Sequence               | Expected size |
| <i>Slco2a1</i> | NM_022667      | Sense primer      | gccagataccacaaggaga    | 166bp         |
|                |                | Anti-sense primer | gatggcgaataggatggaga   |               |
| <i>Ptger2</i>  | NM_031088      | Sense primer      | cagctcggagcaaaagaag    | 129bp         |
|                |                | Anti-sense primer | cataatggccaggagaatgagg |               |
| <i>Ptger4</i>  | NM_032076      | Sense primer      | gtcatcttactcatgccacct  | 139bp         |
|                |                | Anti-sense primer | ttctgatggcctgcaaatcc   |               |
| <i>Vegfa</i>   | NM_001110333.2 | Sense primer      | aacctaccaaagccagcac    | 125bp         |
|                |                | Anti-sense primer | ttgaccctttcccttctc     |               |
| <i>Dspp</i>    | NM_012790      | Sense primer      | cggtattgaagaaggcgatg   | 122bp         |
|                |                | Anti-sense primer | atccctgatttgctctgc     |               |
| <i>Nestin</i>  | AF538924.1     | Sense primer      | tccttagccacaaccctcaac  | 109bp         |
|                |                | Anti-sense primer | agatttgcccctcatcttc    |               |
| <i>Ngf</i>     | NM_001277055.1 | Sense primer      | aaccaatagctgcccgtgtg   | 139bp         |
|                |                | Anti-sense primer | aatccagagtgtccgaagagg  |               |
| <i>β-actin</i> | NM_031144.2    | Sense primer      | cagggtgatggtgggtat     | 146bp         |
|                |                | Anti-sense primer | gtgtggtgccaatctctc     |               |
